# Supplementary material for: Phosphogypsum Organic, a Byproduct from Rare-Earth Metals Processing, Improves Plant and Soil
Source: MDPI journal article supplement (doi:10.3390/agronomy11122561), 2021-12-16
Supplement: s1 [file s1]

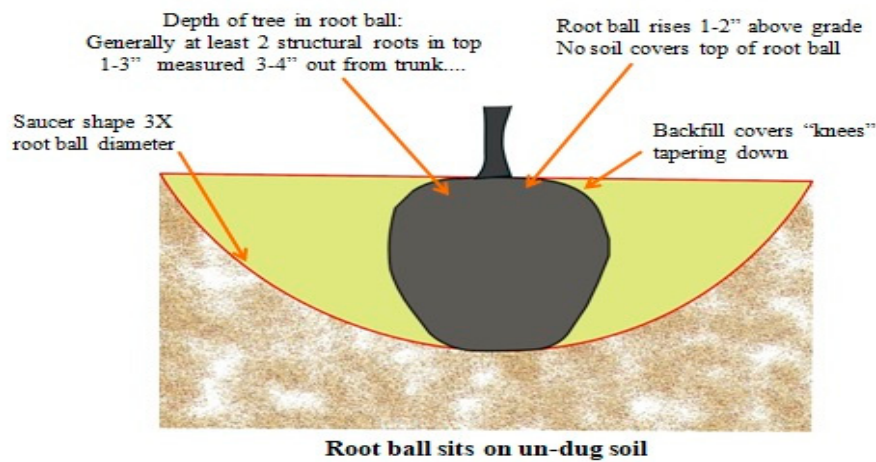

**Figure S1.** The method used in the planting of teak wood and coconut seedlings in planting holes in the field and in black plastic bags, respectively. *Note: The PG organic treatments were only added once at the initial of planting.*

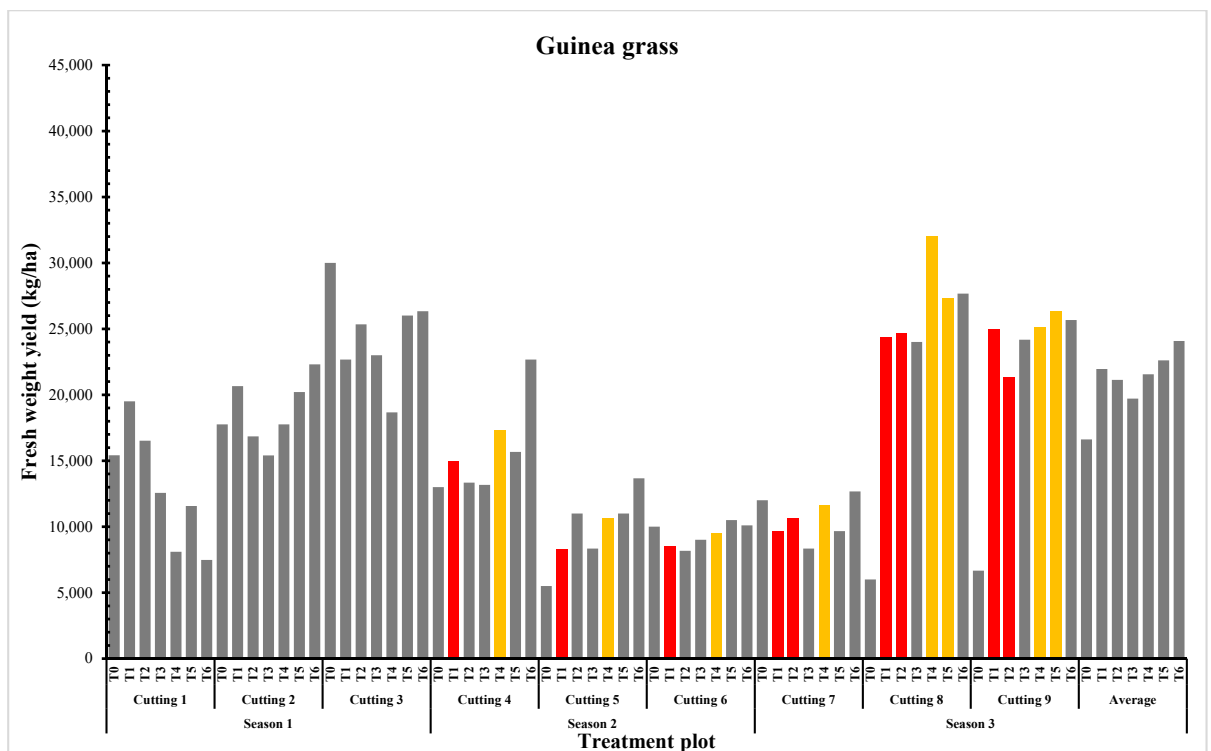

**Figure S2.** Fresh weight yield of guinea grass grown on a sandy soil with the addition of PG organic or without PG organic (residual) at every season in combination with half- and full-recommended rates of fertilizer. *Note: Shaded parts represent residual treatment, red (a half-fertilizer rate) and yellow (full-fertilizer rate; After 3 season, total PG organic received by plot, T1 and T4 = 28 ton/ha, T2 and T5 = 56 ton/ha and T3 and T6 = 84 ton/ha.*

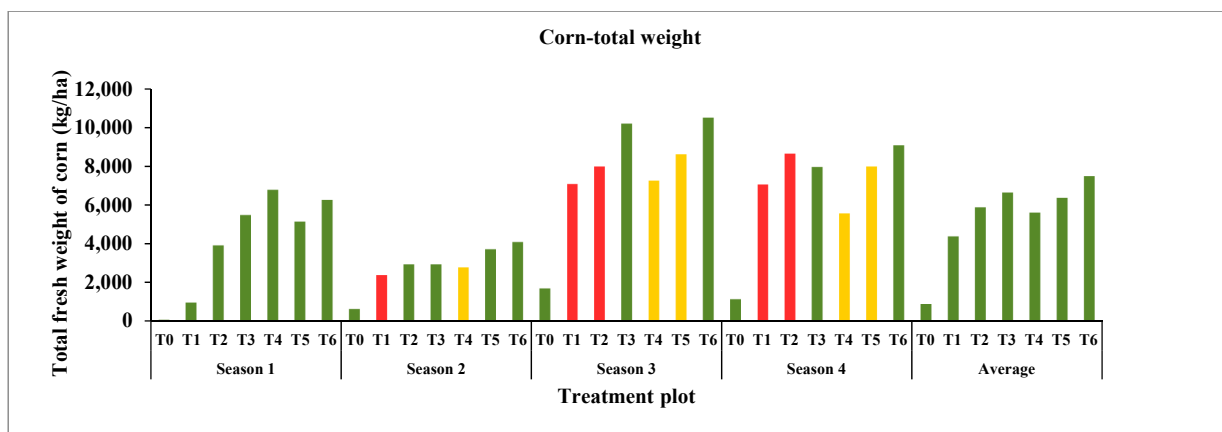

**Figure S3.** Total fresh weight of corn grown on a sandy soil with the addition of PG organic or without PG organic (residual) at every season in combination with the half and full recommended rates of fertilizer. *Note: Shaded parts represent residual treatment, red (a half-fertilizer rate) and yellow (full-fertilizer rate), red and yellow colors variations indicate the same plot received the second cycle of residual treatment); After 3 season, total PG organic received by plot, T1 and T4 = 28 ton/ha, T2 and T5 = 84 ton/ha and T3 and T6 = 112 ton/ha.*

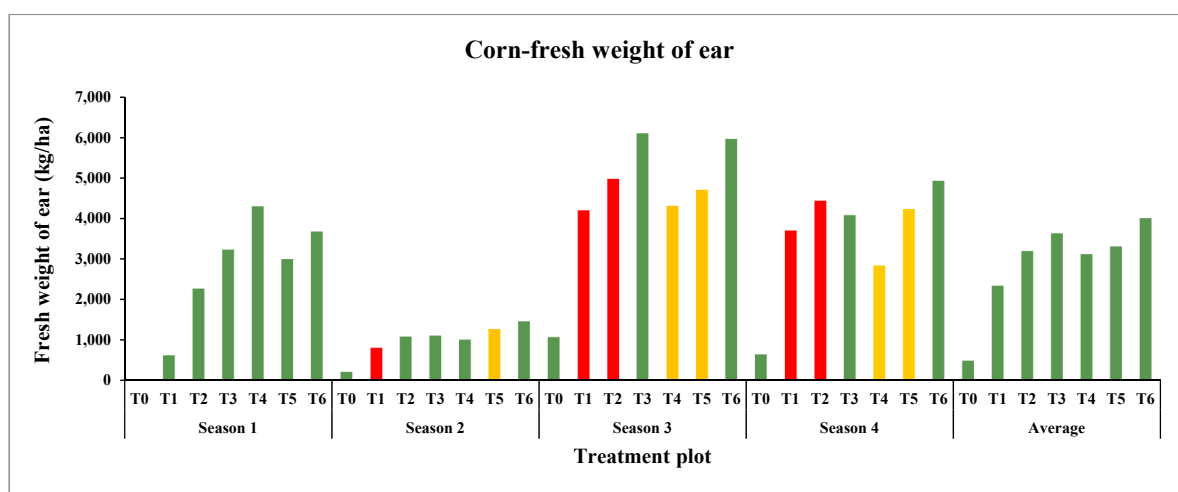

**Figure S4.** Fresh weight of corn ears grown on a sandy soil with the addition of PG organic or without PG organic (residual) in every season in combination with the half and full recommended rates of fertilizer. *Note: shaded parts represent residual treatment, red (a half-fertilizer rate) and yellow (full-fertilizer rate), red and yellow colors variations indicate the same plot received the second cycle of residual treatment); After 3 season, total PG organic received by plot, T1 and T4 = 28 ton/ha, T2 and T5 = 56 ton/ha and T3 and T6 = 112 ton/ha.*

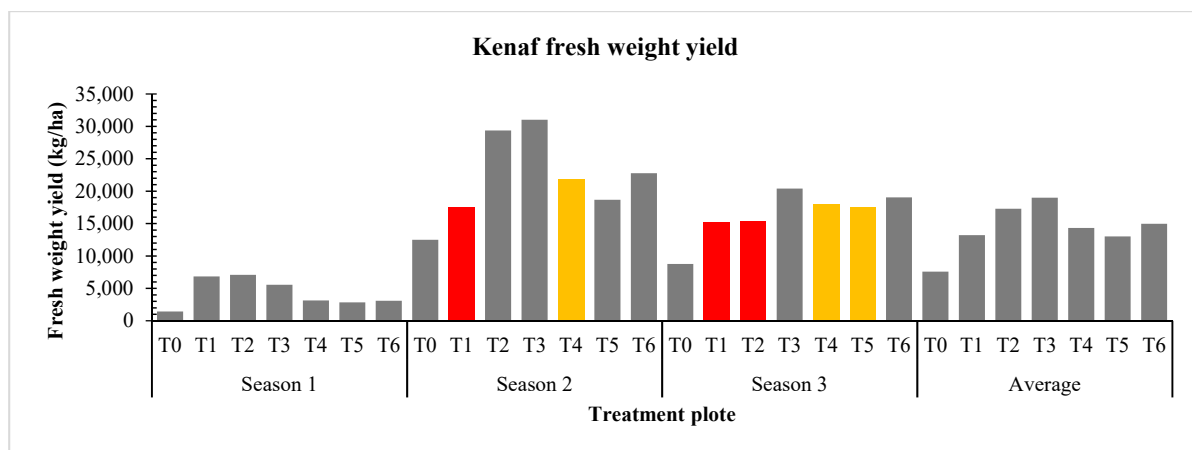

**Figure S5.** Fresh weight yield of kenaf grown on a sandy soil with the addition of PG organic or without PG organic (residual) at every season in combination with half and full recommended rates of fertilizer. *Note: shaded parts represent residual treatment, red (a half-fertilizer rate) and yellow (full-fertilizer rate); After 3 season, total PG organic received by plot, T1 and T4 = 28 ton/ha, T2 and T5 = 56 ton/ha and T3 and T6 = 84 ton/ha.*

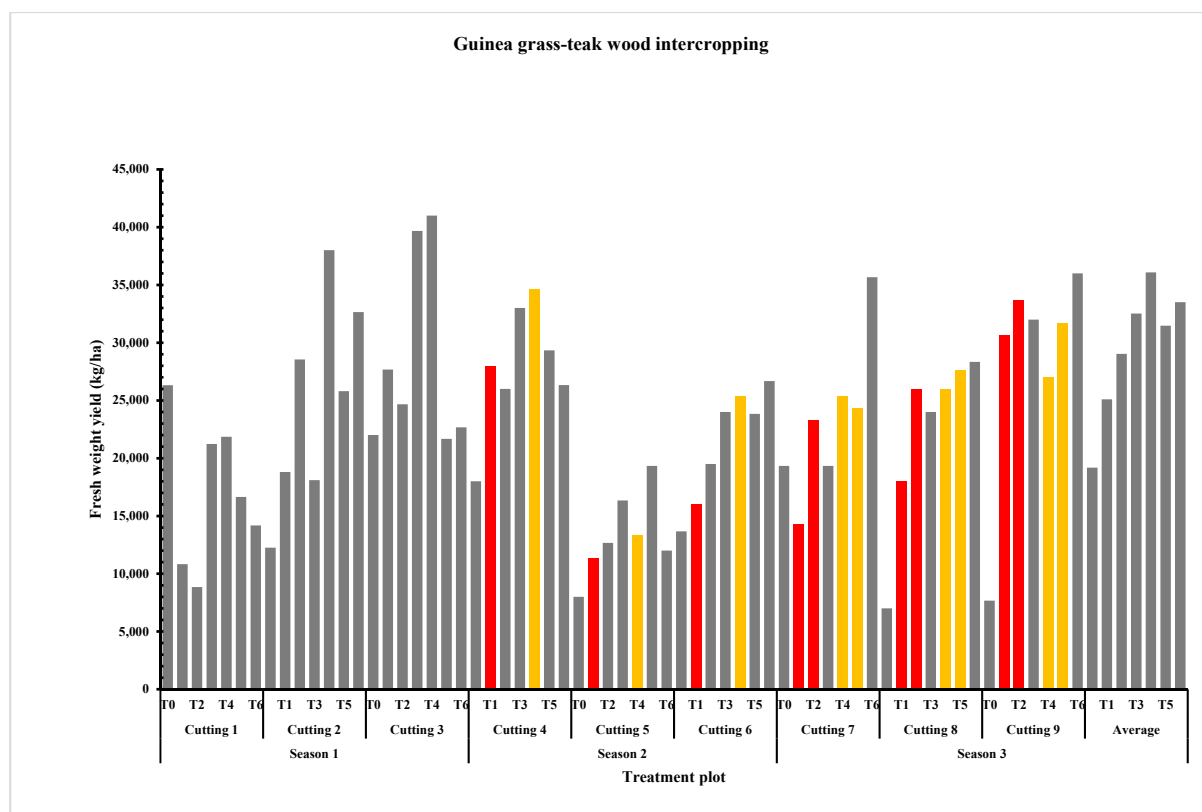

**Figure S6.** Fresh weight yield of guinea grass intercropping with teak wood tree grown on a sandy soil with the addition of PG organic or without PG organic (residual) at every season in combination with half and full recommended rates of fertilizer. *Note: shaded parts represent residual, red (a half-fertilizer rate) and yellow (full-fertilizer rate); after 3 season, total PG organic received by plot, T1 and T4 = 28 ton/ha, T2 and T5 = 56 ton/ha and T3 and T6 = 84 ton/ha.*

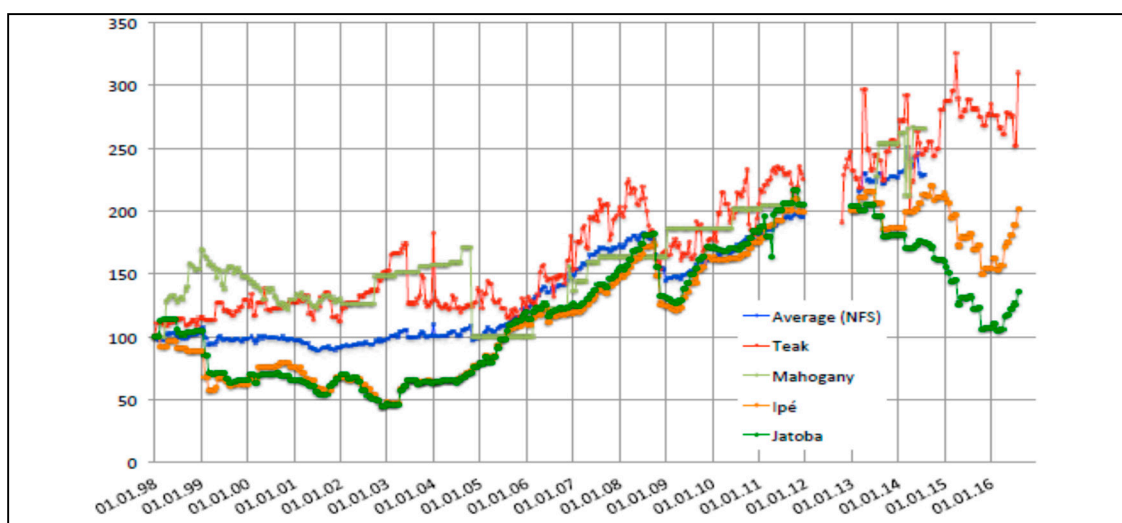

**Figure S7.** Development of teak and mixed species price indices from 1998-2016 (Kollert and Kleine, 2017).

**Table S1.** Soil properties before and after PG organic application in the experimental plot.

| Sample                             | 22-05-<br>2015         | 22-01-<br>2016 | 27-09-2016<br>Harvest 1 |        | 08-12-2016<br>Harvest 2 |       | 24-04-2017<br>Harvest 3 |       |
|------------------------------------|------------------------|----------------|-------------------------|--------|-------------------------|-------|-------------------------|-------|
|                                    | PG organic application |                | Control                 | Max    | Control                 | Max   | Control                 | Max   |
|                                    | Before<br>(baseline)   | After          |                         |        |                         |       |                         |       |
| Sand (%)                           | 87                     | 90             | na                      | na     | 90                      | 91    | 84                      | 85    |
| Silt (%)                           | 8                      | 4              | na                      | na     | 7                       | 5     | 9                       | 8     |
| Clay (%)                           | 5                      | 6              | na                      | na     | 3                       | 4     | 7                       | 7     |
| Texture                            | Sand                   | Sand           | na                      | na     | Sand                    | Sand  | Sand                    | Sand  |
| Organic matter (%)                 | 6.14                   | 5.45           | 5.02                    | 5.25   | 6.10                    | 5.78  | 5.60                    | 5.64  |
| pH water                           | 4.11                   | 4.63           | 5.13                    | 5.34   | 4.15                    | 4.25  | 5.79                    | 6.08  |
| EC (mS/cm)                         | 2.04                   | 2.05           | 1.87                    | 1.96   | 1.94                    | 1.94  | 1.99                    | 2.10  |
| Exch Al (cmol <sup>+</sup> /kg)    | 0.47                   | 0.04           | na                      | na     | 0.01                    | 0.01  | 0.05                    | 0.04  |
| Exch H (cmol <sup>+</sup> /kg)     | 0.33                   | 0.01           | na                      | na     | 0.02                    | 0.01  | 0.04                    | 0.03  |
| Exch Ca (cmol <sup>+</sup> /kg)    | 0.34                   | 0.59           | na                      | na     | 1.53                    | 1.70  | 0.16                    | 0.22  |
| Exch Mg<br>(cmol <sup>+</sup> /kg) | 0.34                   | 0.37           | na                      | na     | 0.86                    | 1.01  | 0.71                    | 0.69  |
| Exch Na (cmol <sup>+</sup> /kg)    | 0.19                   | 0.11           | na                      | na     | 1.52                    | 1.18  | 0.22                    | 0.36  |
| Exch K (cmol <sup>+</sup> /kg)     | 0.09                   | 0.30           | na                      | na     | 0.45                    | 0.46  | 0.09                    | 0.09  |
| CEC (cmol <sup>+</sup> /kg)        | 1.75                   | 1.41           | na                      | na     | 4.38                    | 4.36  | 1.20                    | 1.42  |
| Available P (mg/kg)                | 2.44                   | 5.35           | na                      | na     | 1.60                    | 1.39  | 1.90                    | 2.04  |
| Total C (%)                        | 1.70                   | 3.17           | 2.92                    | 3.05   | 16.80                   | 15.17 | 2.30                    | 2.48  |
| Total N (%)                        | 1.16                   | 1.05           | 0.16                    | 0.02   | 0.28                    | 0.28  | 0.10                    | 0.22  |
| Total S (%)                        | 0.13                   | 0.13           | 0.01                    | 0.02   | 0.12                    | 0.09  | 0.02                    | 0.02  |
| C/N ratio                          | 1.47                   | 3.02           | 18.25                   | 152.50 | 59.36                   | 54.40 | 22.35                   | 13.02 |
| Extractable B                      | 0.14d                  | 0.09d          | 1.33c                   | 1.26c  | 7.30a                   | 3.35b | 0.11d                   | 0.12d |

(mg/kg)

|                  |        |        |        |        |        |        |        |        |
|------------------|--------|--------|--------|--------|--------|--------|--------|--------|
| Total Zn (mg/kg) | 21.16d | 18.53d | 10.48e | 9.30e  | 35.09b | 26.80c | 34.47b | 40.31a |
| Total Mn (mg/kg) | 21.43e | 41.98c | 32.39d | 33.89d | 54.69b | 87.74a | 22.55e | 44.47c |

---

*Note: ND, not detectable; In a row, means followed by a common letter are not significantly different at the 5% level.*
